# Supplementary material for: TRIM28 Selective Nanobody Reduces Glioblastoma Stem Cell Invasion
Source: MDPI journal article supplement (doi:10.3390/molecules26175141), 2021-08-25
Supplement: s1 [file s1]

## TRIM28 selective nanobody reduces glioblastoma stem cell invasion

Andrej Porčnik <sup>1</sup>, Metka Novak <sup>2</sup>, Barbara Breznik <sup>2</sup>, Bernarda Majc <sup>2,3</sup>, Barbara Hrastar <sup>2</sup>, Neja Šamec <sup>4</sup>, Alja Zottel <sup>4</sup>, Ivana Jovčevska <sup>4</sup>, Miloš Vittori <sup>5</sup>, Ana Rotter <sup>2</sup>, Radovan Komel <sup>4,\*</sup>, Tamara Lah Turnšek <sup>2,6,\*</sup>

<sup>1</sup> Department of Neurosurgery, University Medical Centre Ljubljana, 1000 Ljubljana, Slovenia; andrej.porcnik@ukclj.si (A.P.)

<sup>2</sup> Department of Genetic Toxicology and Cancer Biology, National Institute of Biology, 1000 Ljubljana, Slovenia; metka.novak@nib.si (M.N.); barbara.hrastar@gmail.com (B.H.); barbara.breznik@nib.si (B.B.); bernarda.majc@nib.si (B.M.); ana.rotter@nib.si (A.R.); tamara.lah@nib.si (T.L.T.)

<sup>3</sup> Jožef Stefan International Postgraduate School, 1000 Ljubljana, Slovenia

<sup>4</sup> Medical Centre for Molecular Biology, Institute for Biochemistry and Molecular Genetics, Faculty of Medicine, University of Ljubljana, 1000 Ljubljana, Slovenia; ivana.jovcevska@mf.uni-lj.si (I.J.); neja.samec@mf.uni-lj.si (N.Š.); alja.zottel@mf.uni-lj.si (A.Z.); radovan.komel@mf.uni-lj.si (R.K.)

<sup>5</sup> Department of Biology, Biotechnical Faculty, University of Ljubljana, 1000 Ljubljana, Slovenia; milos.vittori@bf.uni-lj.si (M.V.)

<sup>6</sup> Faculty of Chemistry and Chemical Technology, University of Ljubljana, 1000 Ljubljana Slovenia

\* Correspondence: T.L.T.: tamara.lah@nib.si; R.K.: radovan.komel@mf.uni-lj.si

## TABLES

Table S1: List of TaqMan® assays used for RT-qPCR analysis (Thermo Fisher Scientific, USA).

| Probe name | Gene name | assay ID      | assay type          | Cat.number |
|------------|-----------|---------------|---------------------|------------|
| GAPDH      | GAPDH     | Hs99999905_m1 | FAM-MGB, S(250rxns) | 4331182    |
| HPRT1      | HPRT1     | Hs02800695_m1 | FAM-MGB, XS(75rxns) | 4453320    |
| TRIM28     | TRIM28    | Hs00232212_m1 | FAM-MGB, XS(75rxns) | 4448892    |
| COL1A2     | COL1A2    | Hs01028956_m1 | FAM-MGB, XS(75rxns) | 4331182    |
| COL1A      | COL1A     | Hs00164004_m1 | FAM-MGB, XS(75rxns) | 4331182    |
| TGFBI      | TGFBI     | Hs00998133_m1 | FAM-MGB, XS(75rxns) | 4331182    |
| THBS1      | THBS1     | Hs00962908_m1 | FAM-MGB, XS(75rxns) | 4331182    |
| DAB2       | DAB2      | Hs01120074_m1 | FAM-MGB, XS(75rxns) | 4331182    |
| S100A4     | S100A4    | Hs00243202_m1 | FAM-MGB, XS(75rxns) | 4331182    |
| P2RX7      | P2RX7     | Hs00175721_m1 | FAM-MGB, XS(75rxns) | 4331182    |
| STMN4      | STMN4     | Hs00229288_m1 | FAM-MGB, XS(75rxns) | 4331182    |
| SOX10      | SOX10     | Hs00366918_m1 | FAM-MGB, XS(75rxns) | 4331182    |
| HER3       | ERBB3     | Hs00176538_m1 | FAM-MGB, XS(75rxns) | 4331182    |
| ACSBG1     | ACSBG1    | Hs00209500_m1 | FAM-MGB, XS(75rxns) | 4331182    |
| KCNF1      | KCNF1     | Hs00266908_s1 | FAM-MGB, XS(75rxns) | 4331182    |
| ID1        | ID1       | Hs03676575_s1 | FAM-MGB, XS(75rxns) | 4453320    |
| SOX2       | SOX2      | Hs01053049_s1 | FAM-MGB, XS(75rxns) | 4453320    |
| CD44       | CD44      | Hs00174139_m1 | FAM-MGB, S(250rxns) | 4331182    |
| OLIG2      | OLIG2     | Hs00377820_m1 | FAM-MGB, XS(75rxns) | 4331182    |

Table S2: Characterisation of GB sample subtypes based on expression of the 15 genes.

| Sample | Subtype | COLIA 2                                                                                                                  |                                                                                  |                                                                  |                                                  |                                                                  |                                                  |                          |                          | ACSBG 1                                  |                          |                  |          |          |  |  |
|--------|---------|--------------------------------------------------------------------------------------------------------------------------|----------------------------------------------------------------------------------|------------------------------------------------------------------|--------------------------------------------------|------------------------------------------------------------------|--------------------------------------------------|--------------------------|--------------------------|------------------------------------------|--------------------------|------------------|----------|----------|--|--|
|        |         | COL1A                                                                                                                    | TGFB1                                                                            | THBS1                                                            | DAB2                                             | S100A4                                                           | P2RX7                                            | STMN4                    | SOX10                    | ERBB3                                    | KCNF1                    | OLIG2            | NOTCH    | NF-KB    |  |  |
| s001   | CL      | 0,0107430,037266                                                                                                         | 2,11509                                                                          | 0,0390420,7604530,5504670,910709                                 | 0,54942                                          | 0,2535180,164841                                                 | 1,6422657,522426                                 | 1,840483                 | 1,398655                 | 1,044742                                 |                          |                  |          |          |  |  |
| s002   | CL      | 0,0224970,081461                                                                                                         | 1,2246710,063549                                                                 | 1,4223150,928091                                                 | 0,937                                            | 0,8068890,2002760,304841                                         | 2,4364956,4991482,079257                         | 1,87655                  | 0,804075                 |                                          |                          |                  |          |          |  |  |
| s003   | CL      | 0,030444                                                                                                                 | 0,06344                                                                          | 1,2279040,3862130,578327                                         | 1,0475430,4812170,3053060,0116550,048439         | 3,86452                                                          | 20,13352                                         | 1,745498                 | 1,6082180,973727         |                                          |                          |                  |          |          |  |  |
| s004   | CL      | 0,7027521,4666381,8281780,170579                                                                                         | 1,45851                                                                          | 1,5111080,4960750,1444970,0150170,0544855,1867152,2853760,626281 | 2,4901120,952573                                 |                                                                  |                                                  |                          |                          |                                          |                          |                  |          |          |  |  |
| s005   | CL      | 0,0167120,030106                                                                                                         | 1,1964950,040828                                                                 | 0,28123                                                          | 1,2001770,2405010,0371460,0011870,008603         | 2,968765                                                         | 15,214240,3720590,7721490,633171                 |                          |                          |                                          |                          |                  |          |          |  |  |
| s006   | CL      | 0,0177040,028778                                                                                                         | 1,4955440,024088                                                                 | 1,604888                                                         | 1,900744                                         | 2,15123                                                          | 2,446527                                         | 1,3263970,263375         | 2,919774                 | 1,545422                                 | 5,842775                 | 3,960549         | 1,391409 |          |  |  |
| s007   | mix     | 0,876903                                                                                                                 | 1,77348                                                                          | 1,4517370,681141                                                 | 1,3165310,870173                                 | 0,38851                                                          | 0,5728740,1000160,0589730,456403                 | 0,91292                  | NA                       | 0,85655                                  | 1,937338                 |                  |          |          |  |  |
| s008   | mix     | 0,0269650,1066240,7349120,090394                                                                                         | 1,5066250,8867890,4192850,1080250,0268520,0284920,544383                         | 2,298997                                                         | 0,17622                                          | 0,455887                                                         | 1,050222                                         |                          |                          |                                          |                          |                  |          |          |  |  |
| s009   | PN      | 0,0135690,025849                                                                                                         | 0,92241                                                                          | 0,2360471,2496941,262799                                         | 1,5157414,1670970,0591740,131645                 | 1,62002                                                          | 1,267204                                         | 40,86526                 | 5,56947                  | 1,702867                                 |                          |                  |          |          |  |  |
| s010   | CL      | 0,00773                                                                                                                  | 0,059795                                                                         | 1,7229490,1266740,9455030,664747                                 | 1,4634610,9485590,2463360,085554                 | 2,1928447,011375                                                 | 1,430553                                         | 3,337731                 | 2,684161                 |                                          |                          |                  |          |          |  |  |
| s011   | CL      | 0,0020460,0115930,9921690,015331                                                                                         | 1,0287520,6965690,5302030,6418380,030463                                         | 0,14358                                                          | 2,45679                                          | 6,957769                                                         | 2,784954                                         | 2,206164                 | 1,554648                 |                                          |                          |                  |          |          |  |  |
| s012   | mix     | 0,034775                                                                                                                 | 0,01097                                                                          | 0,5020310,0227020,2145020,3742880,763597                         | 3,2220490,5509350,8188090,6424570,569106         | 1,864008                                                         | 2,1712680,818807                                 |                          |                          |                                          |                          |                  |          |          |  |  |
| s013   | mix     | 0,005647                                                                                                                 | NA                                                                               | 0,4965430,005452                                                 | 0,13519                                          | 0,206847                                                         | 1,5007                                           | 1,206942                 | 1,328509                 | 10,280740,9340380,0836090,3450650,690321 | 1,466832                 |                  |          |          |  |  |
| s014   | CL      | 0,1207810,297379                                                                                                         | 1,2521420,525453                                                                 | 2,9368470,7844450,985969                                         | NA                                               | 0,01017                                                          | 0,430233                                         | 1,722773                 | 2,8211660,407732         | 0,74736                                  | 1,732473                 |                  |          |          |  |  |
| s015   | mix     | 0,1446140,1217220,6535080,1166340,488642                                                                                 | 1,0061930,1118750,009543                                                         | NA                                                               | 0,016811                                         | 1,156279                                                         | 0,40288                                          | 0,252031                 | 0,5576990,834504         |                                          |                          |                  |          |          |  |  |
| s016   | PN      | 0,0106220,004869                                                                                                         | 3,6963730,009845                                                                 | 1,6885230,752452                                                 | 2,549226                                         | 14,418296,100389                                                 | 1,453963                                         | 4,859812                 | 3,311124                 | 5,994735                                 | 3,075015                 | 2,317953         |          |          |  |  |
| s017   | CL      | 0,0354570,153516                                                                                                         | 1,8549530,083594                                                                 | 2,798036                                                         | 2,9817410,7923810,2358940,1526770,131058         | 2,474198                                                         | 3,187105                                         | 1,381073                 | 2,367617                 | 2,13069                                  |                          |                  |          |          |  |  |
| s018   | CL      | 0,0623380,345172                                                                                                         | 1,285005                                                                         | 0,16959                                                          | 1,568448                                         | 0,83846                                                          | 0,706737                                         | 1,474376                 | 0,86961                  | 0,229355                                 | 3,621238                 | 3,9642120,415488 | 1,006912 | 1,569175 |  |  |
| s019   | CL      | 0,1243250,064741                                                                                                         | 2,0933450,058946                                                                 | 1,948841                                                         | 2,531989                                         | 1,190443                                                         | 1,156693                                         | 0,00436                  | 0,91481                  | 3,001199                                 | 3,404616                 | 5,88396          | 1,784224 | 1,976168 |  |  |
| s020   | PN      | 0,0049220,003056                                                                                                         | 2,8422880,004971                                                                 | 3,9946080,088696                                                 | 2,242342                                         | 4,99102                                                          | 0,887788                                         | 1,646237                 | 3,558184                 | 2,023709                                 | 17,34632                 | 4,262166         | 2,908399 |          |  |  |
| s021   | mix     | 0,0198650,0075690,886218                                                                                                 | 0,05875                                                                          | 0,2389850,7245280,9033310,688064                                 | 1,1874970,856964                                 | 1,268091                                                         | 2,512177                                         | 3,29844                  | 1,642758                 | 0,854799                                 |                          |                  |          |          |  |  |
| s022   | PN      | 0,0626920,0055460,5643920,0872510,4517440,452948                                                                         | 2,559271                                                                         | 3,005958                                                         | 29,78835                                         | 16,23366                                                         | 1,21094                                          | 0,56174                  | 3,021844                 | 1,654655                                 | 1,041388                 |                  |          |          |  |  |
| s023   | mix     | 0,0447340,0027060,7387940,0355330,159227                                                                                 | 1,0262140,832442                                                                 | 3,023443                                                         | 1,94376                                          | 2,3705060,920665                                                 | 2,031218                                         | 2,373847                 | 1,42014                  | 1,023346                                 |                          |                  |          |          |  |  |
| s024   | CL      | 0,1480140,144261                                                                                                         | 0,98368                                                                          | 0,134876                                                         | 0,2081                                           | 1,108735                                                         | 1,9222130,9637110,248148                         | 5,380735                 | 2,909518                 | 8,918588                                 | 2,123012                 | 3,469878         | 1,980662 |          |  |  |
| s025   | CL      | 0,3686010,0210310,6646640,0759730,238224                                                                                 | 2,012019                                                                         | 0,45911                                                          | 0,1867210,055642                                 | 0,47459                                                          | 1,262785                                         | 1,9553350,389367         | 1,65283                  | 3,540112                                 |                          |                  |          |          |  |  |
| s026   | mix     | 0,1461190,0067020,5062810,330752                                                                                         | 2,471195                                                                         | 0,76193                                                          | 0,094952                                         | NA                                                               | 0,0002410,0000010,0467270,0338860,0001060,050205 | 0,40693                  |                          |                                          |                          |                  |          |          |  |  |
| s027   | MES     | 3,5486094,020323                                                                                                         | 5,152646                                                                         | 4,803758                                                         | 2,5145860,3285640,1733160,0014880,0137090,037275 | 0,1615270,5512010,0072620,3296160,780085                         |                                                  |                          |                          |                                          |                          |                  |          |          |  |  |
| s028   | MES     | 2,808029                                                                                                                 | NA                                                                               | 1,843538                                                         | 3,911333                                         | 4,544921                                                         | 1,3096280,1268060,0017990,060601                 | 0,09824                  | 0,067794                 | NA                                       | 0,0002230,1451820,855701 |                  |          |          |  |  |
| s029   | mix     | 3,284406                                                                                                                 | 1,737785                                                                         | 1,89136                                                          | 3,419077                                         | 1,2305990,4290040,390276                                         | NA                                               | 0,0140470,0473770,428341 | 0,02842                  | 0,0005530,432634                         | 1,02534                  |                  |          |          |  |  |
| s030   | MES     | 0,8753050,787815                                                                                                         | 1,233981                                                                         | 10,17887                                                         | 1,906662                                         | 1,1186110,9448180,024995                                         | NA                                               | 0,1455130,988446         | 0,18414                  | 0,0090330,397877                         | 1,840235                 |                  |          |          |  |  |
| s031   | mix     | 0,0000530,0002880,1286330,0001060,0047050,0377030,5573280,016812                                                         | 3,5672810,8872090,3000950,271744                                                 | 3,148641                                                         | 0,952609                                         | 1,218073                                                         |                                                  |                          |                          |                                          |                          |                  |          |          |  |  |
| s032   | mix     | NA                                                                                                                       | 0,0022570,1348760,0005050,0287990,0234570,915631                                 | 0,11737                                                          | 3,7842930,3124520,0121440,3950120,827448         | 0,6305090,332666                                                 |                                                  |                          |                          |                                          |                          |                  |          |          |  |  |
| s033   | mix     | 0,0008570,0007010,1548580,0020030,1605560,0876850,5266430,002081                                                         | 2,4457740,4099920,1851620,181809                                                 | 1,1670680,3788270,760749                                         |                                                  |                                                                  |                                                  |                          |                          |                                          |                          |                  |          |          |  |  |
| s034   | mix     | 0,0008410,001048                                                                                                         | 2,0753620,0151420,1306680,0253530,1168450,0053210,0000160,0019190,053126         | 1,947658                                                         | 1,5825360,229594                                 | 0,59781                                                          |                                                  |                          |                          |                                          |                          |                  |          |          |  |  |
| s035   | CL      | 0,0692130,086003                                                                                                         | 2,9629440,058371                                                                 | 0,61556                                                          | 0,4570940,2827990,8232460,1030530,0418780,095625 | 1,697724                                                         | 1,266418                                         | 1,401271                 | 5,189586                 |                                          |                          |                  |          |          |  |  |
| s036   | mix     | 0,1032840,0001640,4057010,001475                                                                                         | 0,07905                                                                          | 0,0142560,6695060,1438950,0600160,360519                         | 0,39504                                          | 1,21738                                                          | 0,825365                                         | 1,3249220,741346         |                          |                                          |                          |                  |          |          |  |  |
| s037   | mix     | 0,0174630,0010180,3011040,0109980,0968980,625959                                                                         | 1,006514                                                                         | 3,498168                                                         | 3,899864                                         | 4,359523                                                         | 2,18127                                          | 1,724127                 | 1,648217                 | 1,58282                                  | 0,72771                  |                  |          |          |  |  |
| s038   | CL      | 0,2188690,024723                                                                                                         | 1,5169120,3742830,823548                                                         | 2,0851                                                           | 0,8225                                           | 0,566622                                                         | 2,0951910,832297                                 | 1,5333870,645374         | 0,27235                  | 1,318332                                 | 1,35806                  |                  |          |          |  |  |
| s039   | CL      | 0,1291950,363283                                                                                                         | 2,40977                                                                          | 0,159954                                                         | 3,862967                                         | 1,2645440,725185                                                 | 3,820558                                         | 1,2863290,345714         | 2,26798                  | 0,23963                                  | 0,35801                  | 0,812023         | 1,724255 |          |  |  |
| s040   | CL      | 0,1361                                                                                                                   | 0,153832                                                                         | 1,6182580,108231                                                 | 1,589296                                         | 2,166598                                                         | 1,657394                                         | NA                       | 2,364336                 | 1,4372680,7508890,313309                 | 2,766898                 | 2,3886430,951594 |          |          |  |  |
| s041   | MES     | 10,207548,061938                                                                                                         | 1,5770880,7092024,9320830,9350340,5417060,0103870,001263                         | NA                                                               | 0,005287                                         | 2,81084                                                          | NA                                               | 0,4470960,904167         |                          |                                          |                          |                  |          |          |  |  |
| s042   | mix     | 0,79876                                                                                                                  | 2,247731                                                                         | 2,359017                                                         | 1,8288870,5410630,7642740,4385180,029358         | 0,00888                                                          | 0,112456                                         | 1,180543                 | 2,7863720,845132         | 1,0840140,953197                         |                          |                  |          |          |  |  |
| s043   | mix     | 0,4911720,3422630,7890670,1991070,5348450,4177540,634038                                                                 | 1,013619                                                                         | 0,3305                                                           | 0,2515650,713472                                 | 1,199158                                                         | 3,609955                                         | 0,7230670,689825         |                          |                                          |                          |                  |          |          |  |  |
| s044   | mix     | 0,0964460,170519                                                                                                         | 0,35207                                                                          | 0,120508                                                         | 0,14781                                          | 0,0833810,4620040,551022                                         | 1,540362                                         | 1,0514730,834152         | 1,0212050,705231         | 0,3846850,301943                         |                          |                  |          |          |  |  |
| s045   | PN      | 0,1772150,3868610,4502850,222484                                                                                         | 0,45718                                                                          | 0,1297170,883595                                                 | 1,50923                                          | 4,345073                                                         | 3,9234730,5000910,949333                         | 7,825623                 | 6,2913760,666993         |                                          |                          |                  |          |          |  |  |
| s046   | mix     | 1,440269                                                                                                                 | 1,7534060,7295380,2670220,1532270,2640990,3912980,3510190,0264140,7010120,950706 | 1,161139                                                         | 1,832965                                         | 1,6778180,793034                                                 |                                                  |                          |                          |                                          |                          |                  |          |          |  |  |
| s047   | mix     | 0,0226280,041685                                                                                                         | 0,75995                                                                          | 0,1518660,395881                                                 | 0,33706                                          | 0,69415                                                          | 0,288272                                         | 2,27368                  | 0,5006170,1067290,151358 | 1,465795                                 | 1,233821                 | 1,702291         |          |          |  |  |
| s048   | mix     | 0,5058270,398706                                                                                                         | 1,1607990,0383050,4485060,4275170,6851120,184248                                 | NA                                                               | 0,168631                                         | 3,0698180,618881                                                 | 2,502464                                         | 1,247276                 | 1,162164                 |                                          |                          |                  |          |          |  |  |
| s049   | mix     | 0,0874670,575067                                                                                                         | 0,272                                                                            | 0,0834280,0811680,2071710,2333690,0517010,0059950,1068550,295024 | 1,145973                                         | 1,318919                                                         | 2,4098820,679848                                 |                          |                          |                                          |                          |                  |          |          |  |  |
| s050   | mix     | 0,612476                                                                                                                 | 0,58487                                                                          | 1,143947                                                         | 2,336123                                         | 1,5509480,3999270,8622970,3202090,5717660,2717830,078308         | 0,08372                                          | 0,3811780,212951         | 1,313305                 |                                          |                          |                  |          |          |  |  |
| s051   | CL      | 3,169283                                                                                                                 | 1,151673                                                                         | 1,048953                                                         | 3,978698                                         | 1,217193                                                         | 1,4196390,5606780,3206130,0276580,082101         | 0,37633                  | 0,1817670,1705770,799669 | 3,090328                                 |                          |                  |          |          |  |  |
| s052   | PN      | 0,111348                                                                                                                 | 0,12249                                                                          | 0,2725170,1295910,1255370,107342                                 | 2,005383                                         | 0,87984                                                          | 9,389925                                         | 3,700291                 | 0,22763                  | 0,460295                                 | 8,984523                 | 1,797205         | 0,68204  |          |  |  |
| s053   | MES     | 16,2825                                                                                                                  | 2,273361                                                                         | 1,738287                                                         | 4,221793                                         | 1,5470180,7240090,9530690,2510270,2330990,2612860,8808920,544448 | 1,172891                                         | 1,905386                 | 1,159295                 |                                          |                          |                  |          |          |  |  |
| s054   | MES     | 9,936406                                                                                                                 | 6,195340                                                                         | 8,15623                                                          | 1,32067                                          | 0,4505170,8971990,4285530,0984840,059288                         | NA                                               | 0,7118290,0278960,230391 | 0,318308                 | 0,650022                                 |                          |                  |          |          |  |  |
| s055   | mix     | 0,2174520,1202480,2110680,1392290,1767350,1344910,0890680,0023350,0079960,0061370,0702310,1142010,0219530,1434180,760049 |                                                                                  |                                                                  |                                                  |                                                                  |                                                  |                          |                          |                                          |                          |                  |          |          |  |  |

|      |     |                                                                                                                          |  |  |  |  |  |  |  |  |  |         |                                                                                                          |  |  |  |  |  |  |  |  |  |                                          |                                                  |                  |                  |         |                                  |  |  |  |  |  |
|------|-----|--------------------------------------------------------------------------------------------------------------------------|--|--|--|--|--|--|--|--|--|---------|----------------------------------------------------------------------------------------------------------|--|--|--|--|--|--|--|--|--|------------------------------------------|--------------------------------------------------|------------------|------------------|---------|----------------------------------|--|--|--|--|--|
| s056 | PN  | 0,8622981,1928131,0291281,1398291,1681310,3396352,739298                                                                 |  |  |  |  |  |  |  |  |  | NA      | 7,9938638,4902830,566048                                                                                 |  |  |  |  |  |  |  |  |  | 1,26396                                  | 3,58491                                          | 1,1725351,033517 |                  |         |                                  |  |  |  |  |  |
| s057 | mix | 0,1810430,1908970,6869663,1690780,5245750,4015921,1609810,3630362,0575891,0415210,1280550,056239                         |  |  |  |  |  |  |  |  |  | 3,77515 | 0,88432                                                                                                  |  |  |  |  |  |  |  |  |  | 0,710062                                 |                                                  |                  |                  |         |                                  |  |  |  |  |  |
| s058 | mix | 0,2624770,6969141,1010540,3870381,3104280,5584710,5768510,2668110,5935520,5247270,7467542,1667971,5751171,1353410,855542 |  |  |  |  |  |  |  |  |  |         |                                                                                                          |  |  |  |  |  |  |  |  |  |                                          |                                                  |                  |                  |         |                                  |  |  |  |  |  |
| s059 | mix | 0,0823980,2379250,6642620,0465850,2993830,366682                                                                         |  |  |  |  |  |  |  |  |  | 0,33153 | 0,0665440,0000090,1234221,2556113,0472291,6258211,8645910,889711                                         |  |  |  |  |  |  |  |  |  |                                          |                                                  |                  |                  |         |                                  |  |  |  |  |  |
| s060 | mix | 1,0745742,631891                                                                                                         |  |  |  |  |  |  |  |  |  | 0,80808 | 2,7342280,7195070,4607081,2376930,4204690,0157280,7470950,7650161,4583192,0843832,0679021,748391         |  |  |  |  |  |  |  |  |  |                                          |                                                  |                  |                  |         |                                  |  |  |  |  |  |
| s061 | mix | 0,208731                                                                                                                 |  |  |  |  |  |  |  |  |  | NA      | 1,0125831,0629961,0716550,5357992,1906921,1513234,6352344,1208880,6681730,1834482,5922211,1107530,913997 |  |  |  |  |  |  |  |  |  |                                          |                                                  |                  |                  |         |                                  |  |  |  |  |  |
| s062 | mix | 0,385735                                                                                                                 |  |  |  |  |  |  |  |  |  | NA      | 0,426794                                                                                                 |  |  |  |  |  |  |  |  |  | 4,00968                                  | 0,6026370,2485510,316615                         | 0,06627          | 0,0545720,124204 | 0,62503 | 0,2531690,2831680,3553410,570901 |  |  |  |  |  |
| s063 | mix | 0,036391                                                                                                                 |  |  |  |  |  |  |  |  |  | NA      | 0,0784350,1723570,1344010,0459530,0872330,274462                                                         |  |  |  |  |  |  |  |  |  | NA                                       | 0,0028750,0037260,0042550,0034530,0281040,614451 |                  |                  |         |                                  |  |  |  |  |  |
| s064 | mix | 0,0841880,0624390,3545350,0629080,1592560,1354860,526629                                                                 |  |  |  |  |  |  |  |  |  | 0,56925 | 0,930005                                                                                                 |  |  |  |  |  |  |  |  |  | 0,48103                                  | 0,6116750,2978041,3234760,6414020,506385         |                  |                  |         |                                  |  |  |  |  |  |
| s065 | mix | 1,1843161,8664291,075497                                                                                                 |  |  |  |  |  |  |  |  |  | 0,57469 | 0,6025350,2851970,2191730,0106850,0142710,0579140,1878670,2096850,0195960,2292710,680522                 |  |  |  |  |  |  |  |  |  |                                          |                                                  |                  |                  |         |                                  |  |  |  |  |  |
| s066 | mix | 0,0508280,2144990,7333150,1739041,1904590,1287591,7554580,545233                                                         |  |  |  |  |  |  |  |  |  | 1,05903 | 0,7327070,8085370,1621752,5923591,2594270,573841                                                         |  |  |  |  |  |  |  |  |  |                                          |                                                  |                  |                  |         |                                  |  |  |  |  |  |
| s067 | mix | 0,3438741,0665141,0983541,8509361,9882190,5720030,5955680,0556020,2479260,176846                                         |  |  |  |  |  |  |  |  |  | 0,25176 | 0,0755450,1166370,2817020,641783                                                                         |  |  |  |  |  |  |  |  |  |                                          |                                                  |                  |                  |         |                                  |  |  |  |  |  |
| s068 | mix | 0,2308620,6809950,8411270,0815990,5129260,4349641,6520730,1259410,0198680,0884350,7505030,0836950,4185190,341346         |  |  |  |  |  |  |  |  |  | 0,96208 |                                                                                                          |  |  |  |  |  |  |  |  |  |                                          |                                                  |                  |                  |         |                                  |  |  |  |  |  |
| s069 | mix | 0,066743                                                                                                                 |  |  |  |  |  |  |  |  |  | NA      | 0,0972140,1799120,1499570,0331241,2162940,3127250,2592741,0546110,164098                                 |  |  |  |  |  |  |  |  |  | 0,03663                                  | 0,3060470,6229130,299773                         |                  |                  |         |                                  |  |  |  |  |  |
| s070 | mix | 0,0713980,3131730,1927930,1487570,1869740,0404770,3392360,2081870,1223380,3843241,012747                                 |  |  |  |  |  |  |  |  |  | 0,92193 | 0,7765560,2919940,565369                                                                                 |  |  |  |  |  |  |  |  |  |                                          |                                                  |                  |                  |         |                                  |  |  |  |  |  |
| s071 | mix | 1,3306                                                                                                                   |  |  |  |  |  |  |  |  |  | NA      | 0,8508723,0882791,2895360,6884041,9440810,4251860,030598                                                 |  |  |  |  |  |  |  |  |  | 3,25883                                  | 0,7217031,2156013,594798                         | 1,68744          | 1,030808         |         |                                  |  |  |  |  |  |
| s072 | mix | 0,0695470,2433430,6030770,2837190,3907080,4287970,6851050,3474340,3430340,6694470,5908910,6641330,7747170,4487130,519476 |  |  |  |  |  |  |  |  |  |         |                                                                                                          |  |  |  |  |  |  |  |  |  |                                          |                                                  |                  |                  |         |                                  |  |  |  |  |  |
| s073 | mix | 0,1321690,3630410,1484620,4217120,369017                                                                                 |  |  |  |  |  |  |  |  |  | 0,09637 | 1,7423370,8448655,0760476,2732820,0870820,1151067,0389621,0815010,579174                                 |  |  |  |  |  |  |  |  |  |                                          |                                                  |                  |                  |         |                                  |  |  |  |  |  |
| s074 | mix | 0,0427210,0939670,1522660,2250730,1205980,0592340,5755410,3742522,7487572,5608170,1026630,1384272,0892981,019025         |  |  |  |  |  |  |  |  |  | 0,44415 |                                                                                                          |  |  |  |  |  |  |  |  |  |                                          |                                                  |                  |                  |         |                                  |  |  |  |  |  |
| s075 | mix | 0,0993210,1272210,7774680,0461020,1074860,1646550,5285060,2417650,0648080,1287633,3145694,2830572,8259230,8299320,707406 |  |  |  |  |  |  |  |  |  |         |                                                                                                          |  |  |  |  |  |  |  |  |  |                                          |                                                  |                  |                  |         |                                  |  |  |  |  |  |
| s076 | mix | 1,0738561,1065691,0440490,7154080,3949430,7738330,6204670,2283150,3046540,2575420,973971                                 |  |  |  |  |  |  |  |  |  | 0,63288 | 0,4769060,8409080,776479                                                                                 |  |  |  |  |  |  |  |  |  |                                          |                                                  |                  |                  |         |                                  |  |  |  |  |  |
| s077 | CL  | 0,0873880,041475                                                                                                         |  |  |  |  |  |  |  |  |  | 1,15721 | 0,0061680,2382190,1536791,4106680,8406410,2099830,2444111,7933843,1234040,0531034,3612581,489326         |  |  |  |  |  |  |  |  |  |                                          |                                                  |                  |                  |         |                                  |  |  |  |  |  |
| s078 | mix | 0,1629630,4705151,0089450,6841581,4360050,7794551,3569621,9359892,9868932,104729                                         |  |  |  |  |  |  |  |  |  | 1,00126 | 0,1151110,8537150,8611460,865285                                                                         |  |  |  |  |  |  |  |  |  |                                          |                                                  |                  |                  |         |                                  |  |  |  |  |  |
| s079 | mix | 0,0447680,0964330,5228920,0841850,2895270,1089590,2504010,3183560,0117430,0887941,1348812,4874530,8380221,0409660,642422 |  |  |  |  |  |  |  |  |  |         |                                                                                                          |  |  |  |  |  |  |  |  |  |                                          |                                                  |                  |                  |         |                                  |  |  |  |  |  |
| s080 | mix | 0,0044810,0036280,2215740,0115420,0589260,0160690,8457471,2871072,194599                                                 |  |  |  |  |  |  |  |  |  | 1,73867 | 0,61123                                                                                                  |  |  |  |  |  |  |  |  |  | 0,4662980,7519170,1735310,252088         |                                                  |                  |                  |         |                                  |  |  |  |  |  |
| s081 | mix | 0,2656820,9840222,4454763,4790370,9045490,713911                                                                         |  |  |  |  |  |  |  |  |  | NA      | 0,0293890,0154610,0229290,3847551,7287240,1370220,2992330,640945                                         |  |  |  |  |  |  |  |  |  |                                          |                                                  |                  |                  |         |                                  |  |  |  |  |  |
| s082 | mix | 0,2487080,1499750,4014890,0322010,1242140,0514410,3759181,107428                                                         |  |  |  |  |  |  |  |  |  | 0,78606 | 0,76698                                                                                                  |  |  |  |  |  |  |  |  |  | 1,4633180,5964350,3272140,6244010,235083 |                                                  |                  |                  |         |                                  |  |  |  |  |  |
| s153 | mix | 1,8137030,233101                                                                                                         |  |  |  |  |  |  |  |  |  | 1,28324 | 0,3360450,5537270,1853770,9887890,7728573,6699290,8208311,1466120,2357052,4694131,5147540,703353         |  |  |  |  |  |  |  |  |  |                                          |                                                  |                  |                  |         |                                  |  |  |  |  |  |
| s154 | mix | 0,1838290,0456751,0917570,0774920,2279110,1148591,2548260,4695081,1181440,7437471,1572490,3472080,9848010,4250860,390933 |  |  |  |  |  |  |  |  |  |         |                                                                                                          |  |  |  |  |  |  |  |  |  |                                          |                                                  |                  |                  |         |                                  |  |  |  |  |  |
| s156 | CL  | 0,3407220,876858                                                                                                         |  |  |  |  |  |  |  |  |  | 2,52071 | 0,1511441,4067242,9431651,0233880,4596780,1297540,4641131,0234912,3557471,4681883,1784591,177528         |  |  |  |  |  |  |  |  |  |                                          |                                                  |                  |                  |         |                                  |  |  |  |  |  |
| s157 | mix | 0,1150330,2562990,9591450,7876530,4150180,219543                                                                         |  |  |  |  |  |  |  |  |  | 0,54452 | 0,5999250,2853460,9360320,3625520,6782121,5299260,9999260,457483                                         |  |  |  |  |  |  |  |  |  |                                          |                                                  |                  |                  |         |                                  |  |  |  |  |  |
| s158 | mix | 0,7195990,7421030,9116271,8918730,7539080,3903170,435278                                                                 |  |  |  |  |  |  |  |  |  | 0,58244 | 0,2564910,2109210,2048940,2559190,3356541,1691410,823789                                                 |  |  |  |  |  |  |  |  |  |                                          |                                                  |                  |                  |         |                                  |  |  |  |  |  |
| s159 | mix | 1,3886170,5184420,9062610,0909190,3645210,2219140,7119780,598255                                                         |  |  |  |  |  |  |  |  |  | 0,17056 | 0,6859241,0606471,5598441,5834842,1469480,755996                                                         |  |  |  |  |  |  |  |  |  |                                          |                                                  |                  |                  |         |                                  |  |  |  |  |  |
| s160 | mix | 0,0839550,4234221,6638940,7386150,622259                                                                                 |  |  |  |  |  |  |  |  |  | 0,31139 | 0,3850450,0814280,0834640,4129620,0831640,2828490,5039910,3171860,740798                                 |  |  |  |  |  |  |  |  |  |                                          |                                                  |                  |                  |         |                                  |  |  |  |  |  |
| s161 | PN  | 0,083971                                                                                                                 |  |  |  |  |  |  |  |  |  | NA      | 2,3428120,1974551,2828310,1918044,5601778,29931710,959466,0128981,5164550,072288                         |  |  |  |  |  |  |  |  |  | 3,82944                                  | 0,4062820,754017                                 |                  |                  |         |                                  |  |  |  |  |  |
| s162 | mix | 0,4094770,8073390,8442710,9182761,0081170,206438                                                                         |  |  |  |  |  |  |  |  |  | 0,82124 | 0,4944842,3872280,7084970,2298470,1279071,2993690,4291360,893916                                         |  |  |  |  |  |  |  |  |  |                                          |                                                  |                  |                  |         |                                  |  |  |  |  |  |
| s163 | mix | 0,0795050,2663160,6530070,0865170,1911370,1851980,527909                                                                 |  |  |  |  |  |  |  |  |  | 1,67599 | 0,4443640,2707790,2391241,3383451,3400010,4918210,266051                                                 |  |  |  |  |  |  |  |  |  |                                          |                                                  |                  |                  |         |                                  |  |  |  |  |  |
| s164 | PN  | 0,0814270,3853981,772612                                                                                                 |  |  |  |  |  |  |  |  |  | 0,0485  | 0,3410120,0654163,6532934,9335026,6212325,9727831,1740620,153662                                         |  |  |  |  |  |  |  |  |  | 2,4633                                   | 0,3253190,742077                                 |                  |                  |         |                                  |  |  |  |  |  |
| s178 | MES | 14,1921626,212121,5633111,0121461,0021561,4463520,3576250,0813740,0490580,0499930,0259450,784206                         |  |  |  |  |  |  |  |  |  | 0,00723 | 0,3464510,678689                                                                                         |  |  |  |  |  |  |  |  |  |                                          |                                                  |                  |                  |         |                                  |  |  |  |  |  |

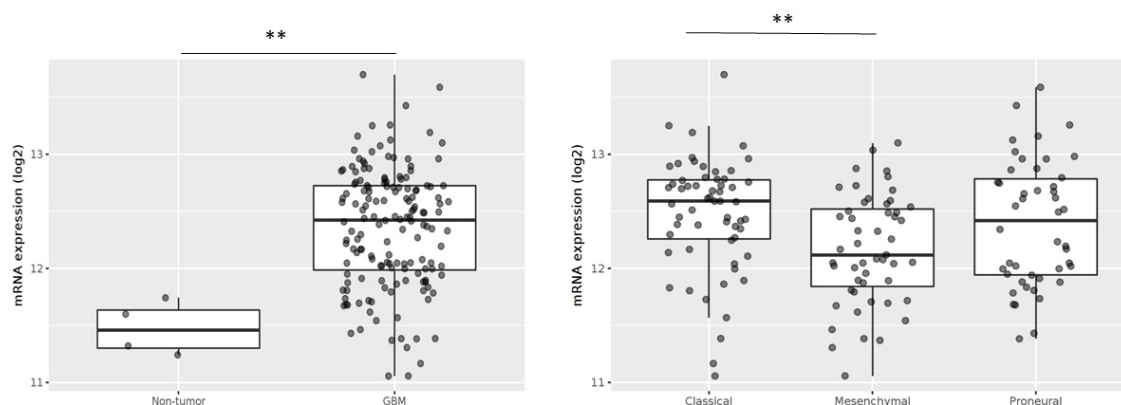

**Figure S1.** *TRIM28* gene expression in glioma tissues and GB tissue subtypes. *TRIM28* mRNA expression levels were determined in GB (n=156), non-cancerous brain tissues (N, n=4) and in GB subtypes CL (n=59), PN (n= 46) and MES (n=51). Expression *TRIM28* values were analysed and visualised in TCGA GlioVIS database. (<http://gliovis.bioinfo.cnio.es/>). Tukey's post hoc test was used for multiple comparison between groups with significance levels (\*\* P < 0.01).

Histology: GBM; Subtype: All; Cutoff: median

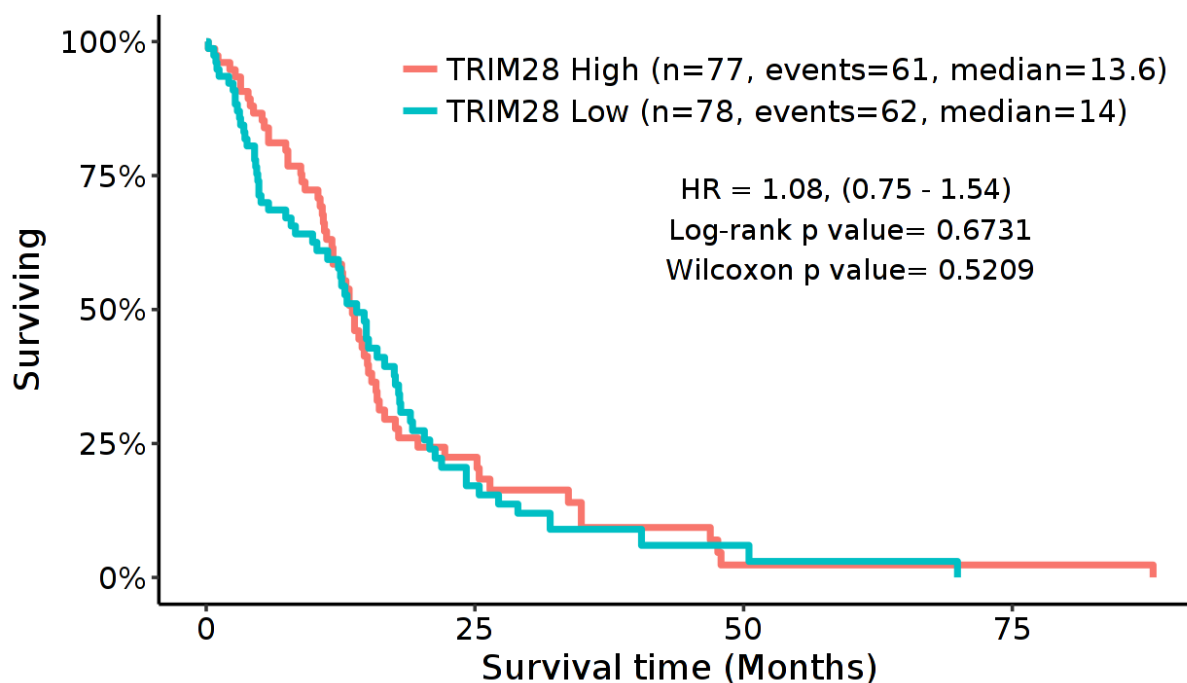

**Figure S2.** Kaplan-Meier survival curves for a cohort of 155 GB patients with high (red) and low (blue) expression of *TRIM28* based on median gene expression value analysed and visualised in GlioVIS database.

(<http://gliovis.bioinfo.cnio.es/>). *TRIM28* is not related to survival rate in this validation cohort of patients, similar to our experimental cohort (Fig.3).

### KM analysis

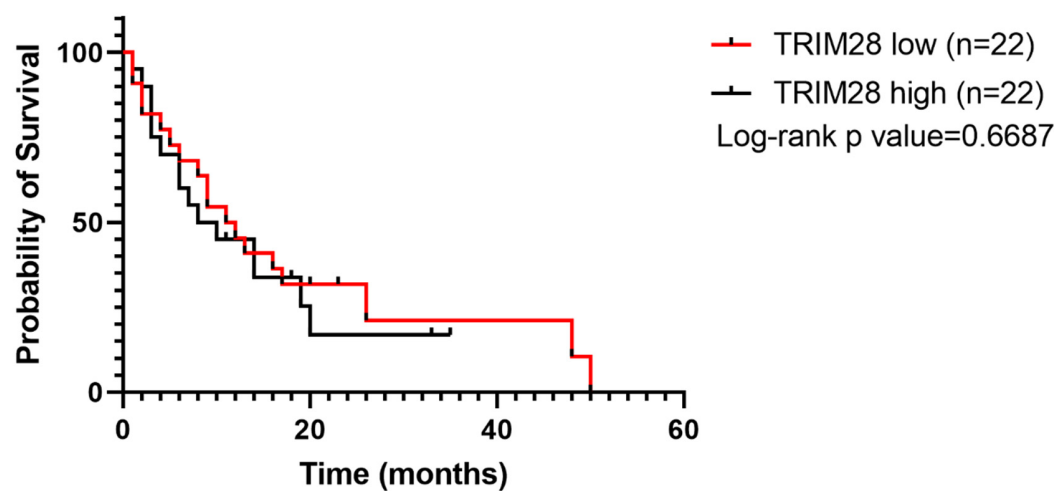

**Figure S3.** Kaplan–Meier survival curves for the two-quartile cut-off high/low *TRIM28* expression in the top/bottom 25% of the samples. Kaplan–Meier survival curves for a cohort of 44 GB samples with high (black line)/low (red line) *TRIM28* expression in the top/bottom 25% of the samples. *TRIM28* expression is not related to survival rate in our cohort of patients. Kaplan–Meier survival curves analyses were performed using GraphPad Prism software.

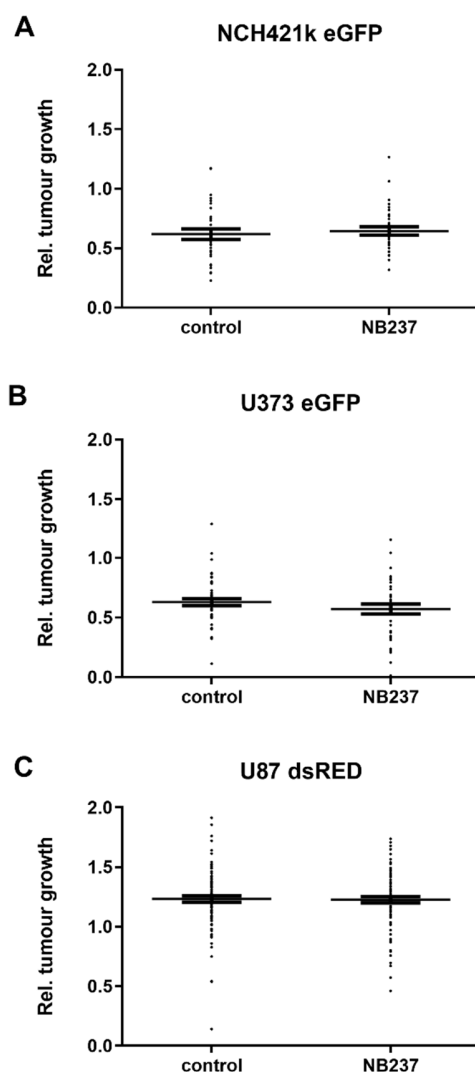

**Figure S4.** In vivo imaging of tumour growth in the brain of zebrafish embryos. Embryos 72h after the xenotransplantation of (A) NCH421k eGFP, (B) U373eGFP and (C) U87DsRed in the brain (visible as red and green fluorescence) without (control) or with the TRIM28 nanobody NB237. Data are shown as means  $\pm$  S.D., dots on graphs A, B and C represent each embryo. Fluorescence intensity of GB xenograft at 72h was normalised to fluorescence intensity of GB xenograft at 24h after xenotransplantation to determine relative tumour growth. Number of embryos in control and with NB237 in the experiment with U373 n=37-50, U87 n=94-108, NCH421k n=13-38. Statistical analyses were performed using GraphPad Prism software, using Mann–Whitney test.
